# Supplementary material
Source: publisher figshare collection journal article supplement (https://karger.figshare.com/articles/dataset/_/12333833)
Supplement: Supplementary file 2 [file 1]

|    | Molecules    | Description                     | Rinitis | OR   | CI(low) | CI(Up) | BA    | OR   | CI(low) | CI(Up) | OAS   | OR   | CI(low) | CI(Up) | FA    | OR   | CI(low) | CI(Up) | FDEIA | OR   | CI(low) | CI(Up) |
|----|--------------|---------------------------------|---------|------|---------|--------|-------|------|---------|--------|-------|------|---------|--------|-------|------|---------|--------|-------|------|---------|--------|
| 1  | Act d 1      | Cysteine protease               | 5.9%    | 0,63 | 0,51    | 0,77   | 7.3%  | ns   |         |        | 9.6%  | 1,58 | 1,26    | 2,00   | 7.8%  | ns   |         |        | 3.4%  | ns   |         |        |
| 2  | Act d 2      | Thaumatococcus-like protein     | 8.0%    | ns   |         |        | 10.0% | 1,34 | 1,07    | 1,67   | 10.1% | 1,35 | 1,08    | 1,68   | 8.3%  | ns   |         |        | 6.7%  | ns   |         |        |
| 3  | Act d 5      | Kiwellin                        | 0.3%    | ns   |         |        | 0.2%  | ns   |         |        | 0.4%  | ns   |         |        | 0.4%  | ns   |         |        | 0.0%  | ns   |         |        |
| 4  | Act d 8      | PR-10 protein                   | 4.0%    | ns   |         |        | 3.9%  | ns   |         |        | 8.8%  | 3,60 | 2,73    | 4,74   | 3.1%  | ns   |         |        | 3.4%  | ns   |         |        |
| 5  | Aln g 1      | PR-10 protein                   | 10.4%   | 1,32 | 1,08    | 1,61   | 11.3% | ns   |         |        | 23.9% | 4,85 | 4,04    | 5,82   | 8.1%  | 0,73 | 0,61    | 0,87   | 10.1% | ns   |         |        |
| 6  | Alt a 1      | Acidic glycoprotein             | 14.8%   | 1,27 | 1,07    | 1,50   | 17.7% | 1,46 | 1,23    | 1,74   | 16.7% | 1,32 | 1,10    | 1,58   | 13.7% | ns   |         |        | 7.9%  | ns   |         |        |
| 7  | Alt a 6      | Enolase                         | 2.9%    | 0,65 | 0,48    | 0,87   | 3.5%  | ns   |         |        | 4.2%  | ns   |         |        | 3.7%  | ns   |         |        | 1.1%  | ns   |         |        |
| 8  | Amb a 1      | Pectate lyase                   | 1.6%    | ns   |         |        | 1.1%  | ns   |         |        | 1.9%  | ns   |         |        | 1.5%  | ns   |         |        | 1.1%  | ns   |         |        |
| 9  | Ana o 2      | 11S globulin                    | 1.8%    | 0,54 | 0,38    | 0,76   | 2.0%  | ns   |         |        | 2.6%  | ns   |         |        | 3.1%  | 1,80 | 1,27    | 2,56   | 3.4%  | ns   |         |        |
| 10 | Ani s 1      | Serine protease inhibitor       | 2.6%    | 0,32 | 0,24    | 0,42   | 2.9%  | ns   |         |        | 3.1%  | ns   |         |        | 6.5%  | 2,81 | 2,13    | 3,71   | 4.5%  | ns   |         |        |
| 11 | Ani s 3      | Tropomyosin                     | 3.1%    | 0,48 | 0,37    | 0,62   | 4.2%  | ns   |         |        | 4.0%  | ns   |         |        | 6.6%  | 3,11 | 2,34    | 4,13   | 3.4%  | ns   |         |        |
| 12 | Api g 1      | PR-10 protein                   | 3.2%    | ns   |         |        | 4.0%  | ns   |         |        | 7.6%  | 3,62 | 2,69    | 4,87   | 3.3%  | ns   |         |        | 4.5%  | ns   |         |        |
| 13 | Api m 1      | Phospholipase A2                | 1.0%    | 0,53 | 0,33    | 0,83   | 1.3%  | ns   |         |        | 1.0%  | ns   |         |        | 1.8%  | 1,82 | 1,15    | 2,89   | 3.4%  | ns   |         |        |
| 14 | Api m 4      | Melittin                        | 0.8%    | ns   |         |        | 1.0%  | ns   |         |        | 0.9%  | ns   |         |        | 0.9%  | ns   |         |        | 1.1%  | ns   |         |        |
| 15 | Ara h 1      | 7S globulin                     | 1.3%    | 0,47 | 0,31    | 0,70   | 2.3%  | ns   |         |        | 2.2%  | ns   |         |        | 2.5%  | 2,21 | 1,46    | 3,35   | 3.4%  | ns   |         |        |
| 16 | Ara h 2      | Conglutin                       | 0.7%    | 0,36 | 0,22    | 0,59   | 1.2%  | ns   |         |        | 1.6%  | ns   |         |        | 1.7%  | 2,27 | 1,36    | 3,77   | 1.1%  | ns   |         |        |
| 17 | Ara h 3      | 11S globulin                    | 0.7%    | 0,40 | 0,23    | 0,68   | 1.0%  | ns   |         |        | 1.5%  | ns   |         |        | 1.3%  | ns   |         |        | 1.1%  | ns   |         |        |
| 18 | Ara h 6      | 2S albumin                      | 1.7%    | ns   |         |        | 2.5%  | ns   |         |        | 4.7%  | 3,80 | 2,61    | 5,54   | 3.5%  | 4,15 | 2,70    | 6,39   | 1.1%  | ns   |         |        |
| 19 | Ara h 8      | PR-10 protein                   | 6.6%    | ns   |         |        | 7.4%  | ns   |         |        | 16.9% | 5,28 | 4,24    | 6,57   | 5.7%  | ns   |         |        | 6.7%  | ns   |         |        |
| 20 | Ara h 9      | Lipid transfer protein (9k-LTP) | 15.0%   | 0,76 | 0,66    | 0,88   | 18.3% | ns   |         |        | 32.6% | 3,50 | 3,01    | 4,08   | 26.1% | 3,61 | 3,11    | 4,21   | 48.3% | 5,00 | 3,28    | 7,63   |
| 21 | Art v 1      | Defensin                        | 6.9%    | ns   |         |        | 7.0%  | ns   |         |        | 9.6%  | 1,68 | 1,33    | 2,12   | 7.4%  | ns   |         |        | 5.6%  | ns   |         |        |
| 22 | Art v 3      | Lipid transfer protein (9k-LTP) | 13.3%   | ns   |         |        | 14.9% | ns   |         |        | 27.1% | 3,13 | 2,67    | 3,68   | 22.8% | 3,70 | 3,14    | 4,35   | 39.3% | 4,13 | 2,68    | 6,37   |
| 23 | Asp f 1      | Mitogillin family               | 3.0%    | 0,58 | 0,44    | 0,77   | 3.0%  | ns   |         |        | 3.6%  | ns   |         |        | 5.1%  | 2,02 | 1,53    | 2,69   | 6.7%  | ns   |         |        |
| 24 | Asp f 3      | Peroxisomal protein             | 1.5%    | ns   |         |        | 1.8%  | ns   |         |        | 1.1%  | ns   |         |        | 1.6%  | ns   |         |        | 1.1%  | ns   |         |        |
| 25 | Asp f 6      | Mn superoxide dismutase         | 2.7%    | ns   |         |        | 3.1%  | ns   |         |        | 4.3%  | 1,60 | 1,14    | 2,24   | 2.9%  | ns   |         |        | 2.2%  | ns   |         |        |
| 26 | Ber e 1      | 2S albumin                      | 1.4%    | ns   |         |        | 1.6%  | ns   |         |        | 2.4%  | ns   |         |        | 2.7%  | 2,74 | 1,79    | 4,20   | 0.0%  | ns   |         |        |
| 27 | Bet v 1      | PR-10 protein                   | 14.6%   | 1,41 | 1,19    | 1,68   | 13.9% | ns   |         |        | 31.6% | 4,82 | 4,10    | 5,67   | 11.3% | 0,72 | 0,62    | 0,85   | 14.6% | ns   |         |        |
| 28 | Bet v 2      | Profilin                        | 12.8%   | 1,81 | 1,48    | 2,21   | 11.3% | ns   |         |        | 26.9% | 4,80 | 4,04    | 5,71   | 9.5%  | 0,76 | 0,64    | 0,90   | 10.1% | ns   |         |        |
| 29 | Bet v 4      | Polcalcin                       | 3.4%    | 1,77 | 1,21    | 2,58   | 5.4%  | 2,38 | 1,73    | 3,29   | 4.2%  | 1,63 | 1,16    | 2,29   | 2.5%  | ns   |         |        | 3.4%  | ns   |         |        |
| 30 | Bla g 1      | Cockroach group 1               | 0.5%    | ns   |         |        | 0.4%  | ns   |         |        | 0.6%  | ns   |         |        | 0.5%  | ns   |         |        | 0.0%  | ns   |         |        |
| 31 | Bla g 2      | Aspartic protease               | 1.7%    | 0,59 | 0,41    | 0,86   | 2.3%  | ns   |         |        | 1.6%  | ns   |         |        | 1.8%  | ns   |         |        | 0.0%  | ns   |         |        |
| 32 | Bla g 5      | Glutathione S-transferase       | 0.3%    | ns   |         |        | 0.4%  | ns   |         |        | 0.4%  | ns   |         |        | 0.3%  | ns   |         |        | 0.0%  | ns   |         |        |
| 33 | Bla g 7      | Tropomyosin                     | 2.9%    | 0,44 | 0,34    | 0,58   | 4.1%  | ns   |         |        | 3.7%  | ns   |         |        | 6.3%  | 2,88 | 2,17    | 3,83   | 3.4%  | ns   |         |        |
| 34 | Blo t 5      | Mite group 5                    | 6.8%    | ns   |         |        | 9.2%  | 1,51 | 1,20    | 1,91   | 6.1%  | ns   |         |        | 6.2%  | ns   |         |        | 3.4%  | ns   |         |        |
| 35 | Bos d 4      | Alpha-lactalbumin               | 1.5%    | 0,30 | 0,22    | 0,42   | 2.7%  | ns   |         |        | 2.0%  | ns   |         |        | 3.2%  | 1,61 | 1,16    | 2,26   | 2.2%  | ns   |         |        |
| 36 | Bos d 5 A    | Beta-lactoglobulin              | 1.1%    | 0,35 | 0,23    | 0,51   | 1.9%  | ns   |         |        | 1.6%  | ns   |         |        | 2.5%  | 2,03 | 1,36    | 3,03   | 1.1%  | ns   |         |        |
| 37 | Bos d 6      | Serum albumin                   | 1.7%    | 0,40 | 0,28    | 0,56   | 2.6%  | ns   |         |        | 1.8%  | ns   |         |        | 3.0%  | ns   |         |        | 3.4%  | ns   |         |        |
| 38 | Bos d 8      | Casein                          | 1.5%    | 0,41 | 0,29    | 0,59   | 3.0%  | ns   |         |        | 2.5%  | ns   |         |        | 2.9%  | 1,78 | 1,24    | 2,55   | 2.2%  | ns   |         |        |
| 39 | Bos d LTF    | Transferrin                     | 1.0%    | 0,50 | 0,31    | 0,80   | 1.6%  | ns   |         |        | 1.3%  | ns   |         |        | 1.6%  | ns   |         |        | 1.1%  | ns   |         |        |
| 40 | Can f 1      | Lipocalin                       | 10.3%   | ns   |         |        | 14.3% | 1,66 | 1,36    | 2,01   | 9.5%  | ns   |         |        | 9.1%  | ns   |         |        | 4.5%  | ns   |         |        |
| 41 | Can f 2      | Lipocalin                       | 2.4%    | ns   |         |        | 3.8%  | 1,75 | 1,22    | 2,51   | 2.6%  | ns   |         |        | 2.2%  | ns   |         |        | 0.0%  | ns   |         |        |
| 42 | Can f 3      | Serum albumin                   | 2.6%    | ns   |         |        | 4.5%  | 2,40 | 1,69    | 3,41   | 2.6%  | ns   |         |        | 2.7%  | ns   |         |        | 0.0%  | ns   |         |        |
| 43 | Can f 5      | Arginine Esterase               | 14.7%   | 1,31 | 1,10    | 1,55   | 16.3% | 1,29 | 1,08    | 1,54   | 15.8% | ns   |         |        | 13.1% | ns   |         |        | 15.7% | ns   |         |        |
| 44 | Che a 1      | Ole e 1-related protein         | 6.6%    | 1,50 | 1,16    | 1,94   | 6.9%  | ns   |         |        | 8.4%  | 1,63 | 1,27    | 2,08   | 5.5%  | ns   |         |        | 1.1%  | ns   |         |        |
| 45 | Cla h 8      | Mannitol dehydrogenase          | 1.7%    | ns   |         |        | 2.1%  | ns   |         |        | 1.6%  | ns   |         |        | 1.8%  | ns   |         |        | 1.1%  | ns   |         |        |
| 46 | Cor a 1.0101 | PR-10 protein                   | 13.7%   | 1,33 | 1,12    | 1,59   | 14.0% | ns   |         |        | 28.9% | 4,28 | 3,63    | 5,05   | 11.3% | 0,79 | 0,67    | 0,93   | 12.4% | ns   |         |        |
| 47 | Cor a 1.0401 | PR-10 protein                   | 11.2%   | ns   |         |        | 12.5% | ns   |         |        | 25.3% | 4,71 | 3,94    | 5,63   | 9.0%  | 0,75 | 0,63    | 0,90   | 10.1% | ns   |         |        |
| 48 | Cor a 8      | Lipid transfer protein (9k-LTP) | 12.0%   | 0,77 | 0,66    | 0,91   | 14.6% | ns   |         |        | 25.7% | 3,20 | 2,71    | 3,77   | 21.6% | 3,85 | 3,25    | 4,56   | 41.6% | 4,96 | 3,23    | 7,62   |
| 49 | Cor a 9      | 11S globulin                    | 1.6%    | 0,54 | 0,37    | 0,78   | 3.0%  | 1,76 | 1,18    | 2,64   | 3.3%  | 2,03 | 1,37    | 3,02   | 3.0%  | 2,41 | 1,63    | 3,54   | 3.4%  | ns   |         |        |
| 50 | Cry j 1      | Pectate lyase                   | 46.4%   | 1,72 | 1,53    | 1,94   | 45.7% | 1,19 | 1,04    | 1,35   | 52.7% | 1,69 | 1,48    | 1,93   | 39.7% | 0,83 | 0,74    | 0,92   | 40.4% | ns   |         |        |
| 51 | Cup a 1      | Pectate lyase                   | 62.6%   | 1,99 | 1,78    | 2,23   | 58.8% | ns   |         |        | 68.3% | 1,80 | 1,57    | 2,07   | 53.6% | 0,77 | 0,69    | 0,86   | 53.9% | ns   |         |        |
| 52 | Cyn d 1      | Grass group 1                   | 52.6%   | 1,92 | 1,71    | 2,16   | 51.9% | 1,25 | 1,10    | 1,42   | 62.9% | 2,20 | 1,92    | 2,51   | 44.6% | 0,81 | 0,73    | 0,90   | 49.4% | ns   |         |        |
| 53 | Der f 1      | Cysteine protease               | 34.1%   | 1,63 | 1,43    | 1,85   | 42.8% | 1,93 | 1,69    | 2,20   | 31.5% | ns   |         |        | 25.9% | 0,66 | 0,58    | 0,74   | 19.1% | ns   |         |        |
| 54 | Der f 2      | NPC2 family                     | 40.3%   | 1,62 | 1,44    | 1,83   | 48.9% | 1,88 | 1,65    | 2,15   | 37.8% | ns   |         |        | 32.7% | 0,73 | 0,66    | 0,82   | 31.5% | ns   |         |        |
| 55 | Der p 1      | Cysteine protease               | 33.5%   | 1,55 | 1,37    | 1,76   | 42.2% | 1,91 | 1,67    | 2,18   | 31.0% | ns   |         |        | 26.0% | 0,68 | 0,61    | 0,77   | 22.5% | ns   |         |        |
| 56 | Der p 10     | Tropomyosin                     | 5.8%    | 0,64 | 0,51    | 0,79   | 7.5%  | ns   |         |        | 6.2%  | ns   |         |        | 8.9%  | 1,83 | 1,48    | 2,26   | 4.5%  | ns   |         |        |
| 57 | Der p 2      | NPC2 family                     | 40.1%   | 1,53 | 1,36    | 1,73   | 48.7% | 1,83 | 1,61    | 2,09   | 37.8% | ns   |         |        | 33.4% | 0,76 | 0,68    | 0,85   | 30.3% | ns   |         |        |
| 58 | Equ c 1      | Lipocalin                       | 5.1%    | ns   |         |        | 7.1%  | 1,74 | 1,33    | 2,28   | 5.9%  | ns   |         |        | 4.2%  | ns   |         |        | 2.2%  | ns   |         |        |
| 59 | Equ c 3      | Serum albumin                   | 1.8%    | ns   |         |        | 3.1%  | 2,29 | 1,51    | 3,47   | 1.8%  | ns   |         |        | 1.9%  | ns   |         |        | 1.1%  | ns   |         |        |
| 60 | Fag e 2      | 2S albumin                      | 0.3%    | ns   |         |        | 0.3%  | ns   |         |        | 0.5%  | ns   |         |        | 0.4%  | ns   |         |        | 1.1%  | ns   |         |        |
| 61 | Fel d 1      | Uteroglobulin                   | 34.1%   | 1,61 | 1,42    | 1,83   | 41.3% | 1,78 | 1,55    | 2,03   | 37.9% | 1,48 | 1,29    | 1,69   | 27.2% | 0,73 | 0,65    | 0,82   | 15.7% | ns   |         |        |
| 62 | Fel d 2      | Serum albumin                   | 4.0%    | ns   |         |        | 5.4%  | 1,51 | 1,12    | 2,04   | 4.4%  | ns   |         |        | 4.2%  | ns   |         |        | 2.2%  | ns   |         |        |
| 63 | Fel d 4      | Lipocalin                       | 5.4%    | ns   |         |        | 7.6%  | 1,77 | 1,37    | 2,30   | 5.4%  | ns   |         |        | 4.6%  | ns   |         |        | 2.2%  | ns   |         |        |
| 64 | Gad c 1      | Parvalbumin                     | 2.2%    | 0,55 | 0,40    | 0,76   | 2.8%  | ns   |         |        | 4.0%  | 1,61 | 1,13    | 2,29   | 4.6%  | 3,25 | 2,30    | 4,60   | 1.1%  | ns   |         |        |
| 65 | Gad d 1      | Ovomucoid                       | 2.0%    | 0,38 | 0,28    | 0,51   | 2.9%  | ns   |         |        | 3.2%  | ns   |         |        | 3.9%  | 1,72 | 1,26    | 2,33   | 1.1%  | ns   |         |        |
| 66 | Gad d 2      | Ovalbumin                       | 2.2%    | 0,35 | 0,26    | 0,47   | 3.5%  | ns   |         |        | 3.2%  | ns   |         |        | 4.1%  | ns   |         |        | 3.4%  | ns   |         |        |
| 67 | Gad d 3      | Conalbumin/Ovotransferrin       | 1.7%    | 0,44 | 0,31    | 0,61   | 3.2%  | ns   |         |        | 3.2%  | ns   |         |        | 3.1%  | 1,71 | 1,21    | 2,40   | 6.7%  | 3,03 | 1,30    | 7,07   |
| 68 | Gad d 5      | Livetin/Serum albumin           | 0.8%    | 0,49 | 0,30    | 0,81   | 1.0%  | ns   |         |        | 1.1%  | ns   |         |        | 1.2%  | ns   |         |        | 2.2%  | ns   |         |        |
| 69 | Gly m 4      | PR-10 protein                   | 5.3%    | ns   |         |        | 6.0%  | ns   |         |        | 12.2% | 4,08 | 3,20    | 5,19   | 4.1%  | 0,69 | 0,53    | 0,88   | 5.6%  | ns   |         |        |
| 70 | Gly m 5      | Beta-conglycinin                | 2.1%    | 0,54 | 0,39    | 0,75   | 3.1%  | ns   |         |        | 3.4%  | ns   |         |        | 3.5%  | 1,85 | 1,33    | 2,57   | 4.5%  | ns   |         |        |
| 71 | Gly m 6      | Glycinin                        | 1.6%    | 0,30 | 0,22    | 0,42   | 2.4%  | ns   |         |        | 3.0%  | ns   |         |        | 3.7%  | 1,98 | 1,42    | 2,75   | 6.7%  | ns   |         |        |
| 72 | Hev b 1      | Rubber elongation factor        | 0.6%    | 0,44 | 0,25    | 0,78   | 1.0%  | ns   |         |        | 0.6%  | ns   |         |        | 1.4%  | 3,08 | 1,67    | 5,67   | 1.1%  | ns   |         |        |
| 73 | Hev b 3      | Small rubber particle protein   | 0.7%    | ns   |         |        | 1.0%  | ns   |         |        | 0.7%  | ns   |         |        | 1.1%  | 2,44 | 1,29    | 4,60   | 0.0%  | ns   |         |        |
| 74 | Hev b 5      | Acidic protein                  | 0.7%    | 0,38 | 0,23    | 0,66   | 0.7%  | ns   |         |        | 0.6%  |      |         |        |       |      |         |        |       |      |         |        |
